# Supplementary material
Source: Springer Nature journal article supplement (https://www.springermedizin.de/resource/supplementary/13063_2011_659_MOESM2_ESM.pdf/9618430)
Supplement: MOESM2 [file 9618430]

Emergency medical admission to hospital, over 65, confused

MMHU bed available; clinically appropriate

Standard care or MMHU (depending on beds available); not in trial.

Random allocation by clinical service

MMHU

Standard Care

Recruitment, consent/consultee agreement

Declined, not in trial

Non participant observation of care

Carer satisfaction assessment 1-3 weeks after discharge

Follow up assessment at 90 days

Healthcare interventions recorded from case notes

Resource use data collection, interview and electronic sources.
